# Supplementary material
Source: HighWire-hosted journal article supplement (https://tech.snmjournals.org/highwire/filestream/8640/field_highwire_adjunct_files/0/133736_Supplemental_Data.pdf)
Supplement: 133736_Supplemental_Data.pdf [file 133736_Supplemental_Data.pdf]

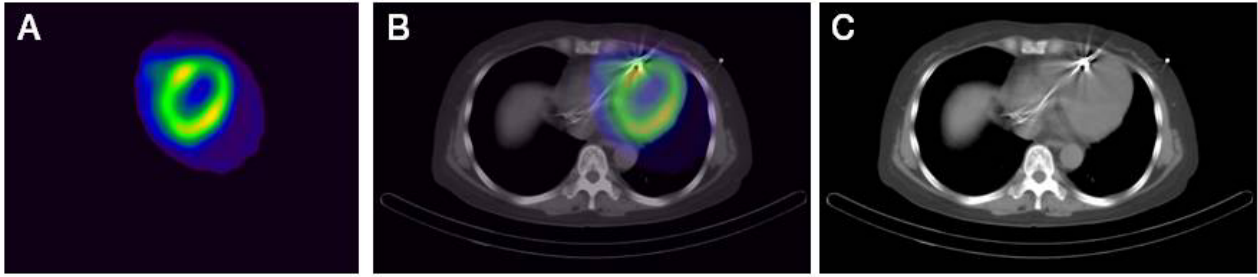

Color version of Figure 1.

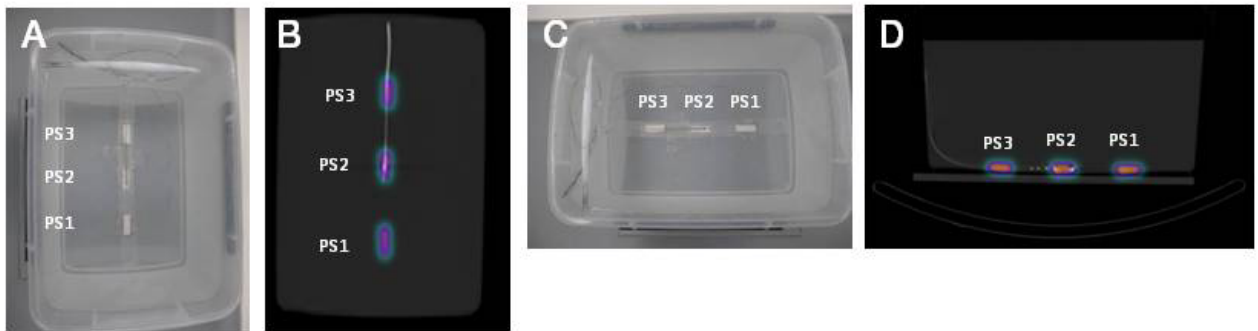

Color version of Figure 2.

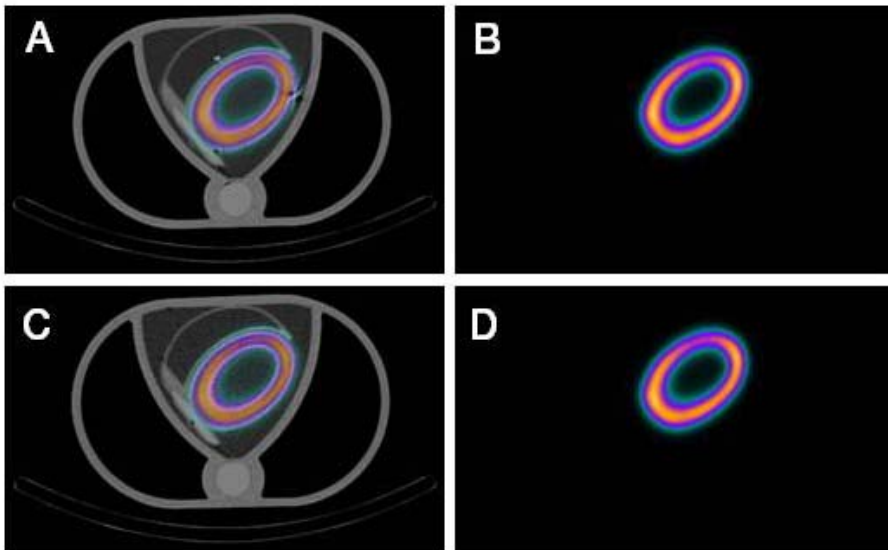

Color version of Figure 4.

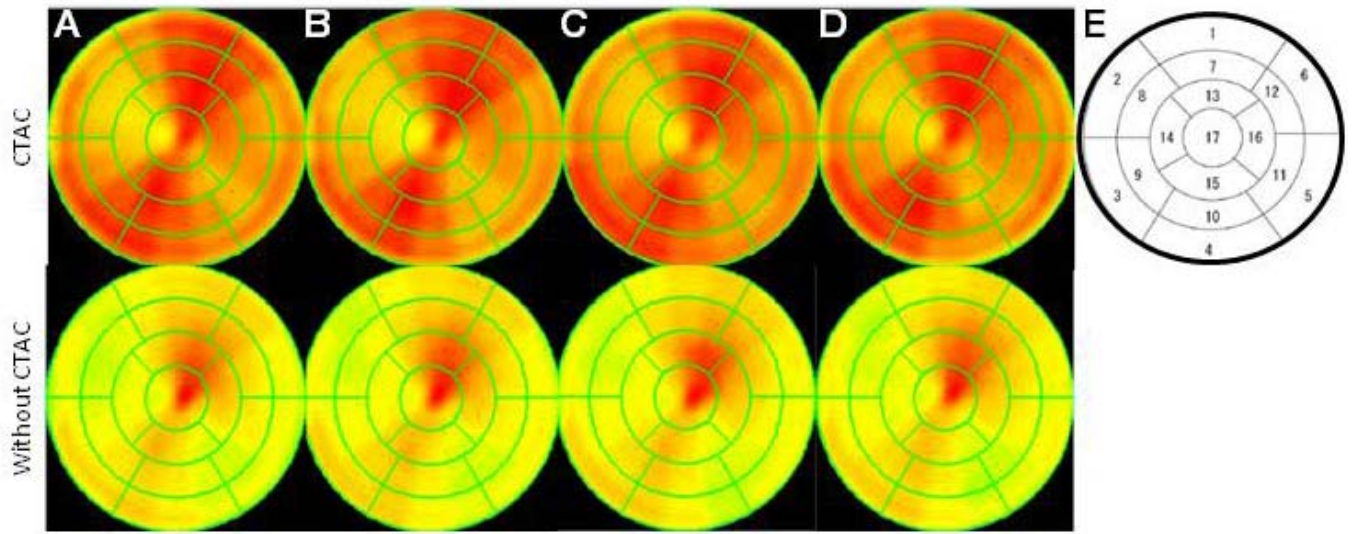

Color version of Figure 5.
